# Supplementary material
Source: Research Square preprint supplement (doi:10.21203/rs.3.rs-9305705/v1)
Supplement: Supplementary file 1 [file b266b7a27ef8a3cf7f9e7a86.xlsx]

## Sheet: TaqMan assay
	Supplementary Table S1 - Description of the TaqMan assays used in the study
	SNP	TaqMan probe	Sequence [VIC/FAM]
	ESR1 rs2046210	C__12034236_10	CTCACACATACATACAGTCACATAC[A/G]CATCTACCTGAAATAAAAGATTCAC
	ESR1 rs9340799	C___3163591_10	TTCCCAGAGACCCTGAGTGTGGTCT[A/G]GAGTTGGGATGAGCATTGGTCTCTA
	ESR2 rs928554	C__11462708_1_	GGATTACAATGATCCCAGAGGGAAA[C/T]TGAAGTGAAAATGTTACCCAAGATT
	SNP, single-nucleotide polymorphism
